# Supplementary material for: miR-409 Inhibits Human Non-Small-Cell Lung Cancer Progression by Directly Targeting SPIN1
Source: PubMed Central journal article supplement — Mol Ther Nucleic Acids. 2018 Sep 1;13:154–63. doi: 10.1016/j.omtn.2018.08.020 (PMC6171160; doi:10.1016/j.omtn.2018.08.020), 2018-09-01
Supplement: mmc1.pdf [file mmc1.pdf]

**OMTN, Volume 13**

## **Supplemental Information**

**miR-409 Inhibits Human Non-Small-Cell Lung**

**Cancer Progression by Directly Targeting SPIN1**

**Qi Song, Quanbo Ji, Jingbo Xiao, Fang Li, Lingxiong Wang, Yin Chen, Yameng Xu, and Shunchang Jiao**

Figure S1

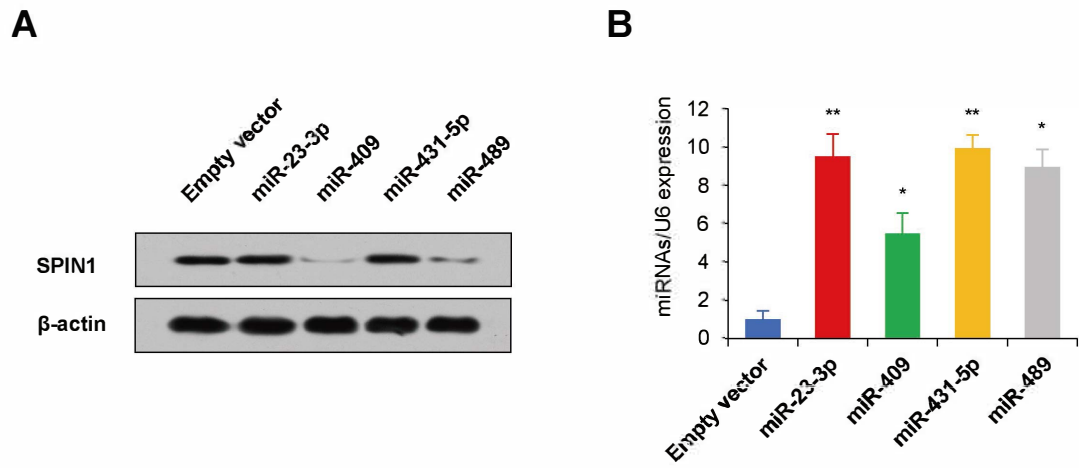

**Figure S1. Screening for potential SPIN1-targeting miRNAs.** Immunoblot analysis of the A549 cells transfected with empty vector, miR-23-3p, miR-409, miR-431-5p, or miR-489. Histograms on the right of the immunoblot graphs show corresponding expression levels of miRNAs by qRT-PCR. \* $p < 0.05$  and \*\* $p < 0.01$ .

## Figure S2

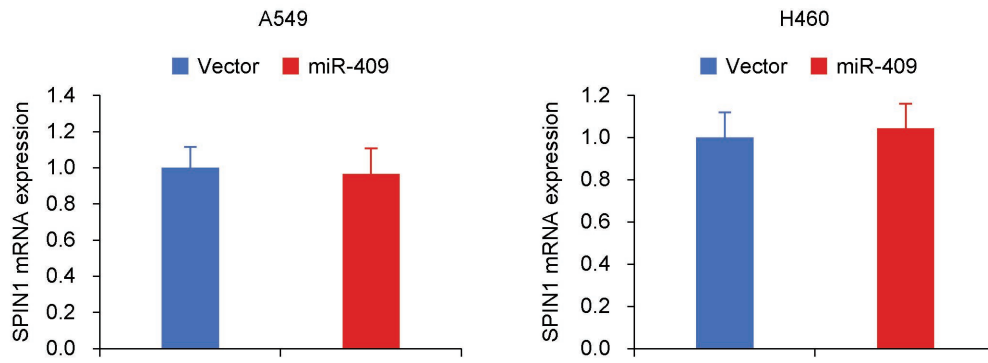

**Figure S2. miR-409 regulates SPIN1 expression in a posttranscriptional way.** Analysis of A549, H460 cells transfected with scramble or miR-409 mimics. The corresponding miRNA expression was determined using qRT-PCR. Each bar represents the mean of at least three independent experiments performed in triplicate  $\pm$  standard deviation. \* $p < 0.05$  and \*\* $p < 0.01$ .

**Figure S3**

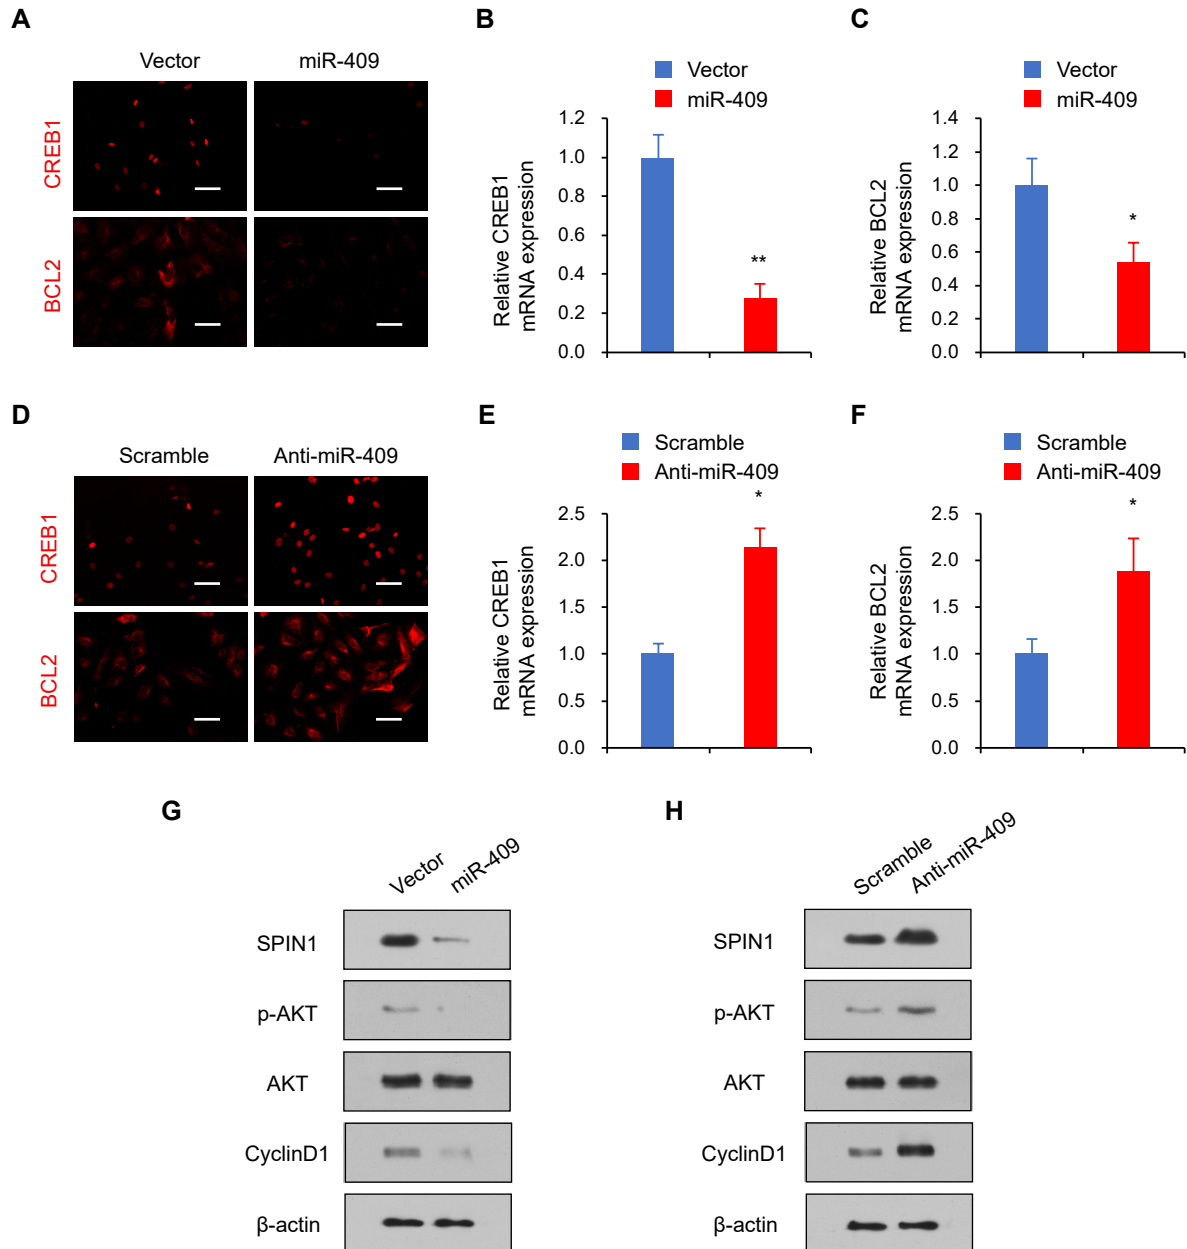

**Figure S3. miR-409 regulates the activation of PI3K/AKT pathway.** (A) Immunofluorescent staining were conducted in A549 cells transfected with miR-409. (B) CREB1 expression levels were assessed by qRT-qPCR. (C) BCL2 expression levels were assessed by qRT-qPCR. (D) Immunofluorescent staining were conducted in A549 cells transfected with anti-miR-409. (E) CREB1 expression levels were assessed by qRT-qPCR. (F) BCL2 expression levels were assessed by qRT-qPCR. \* $p < 0.05$ , \*\* $p < 0.01$ . (G) Immunoblot analysis of the A549 transfected with miR-409. (H) Immunoblot analysis of the A549 transfected with anti-miR-409.

**Figure S4**

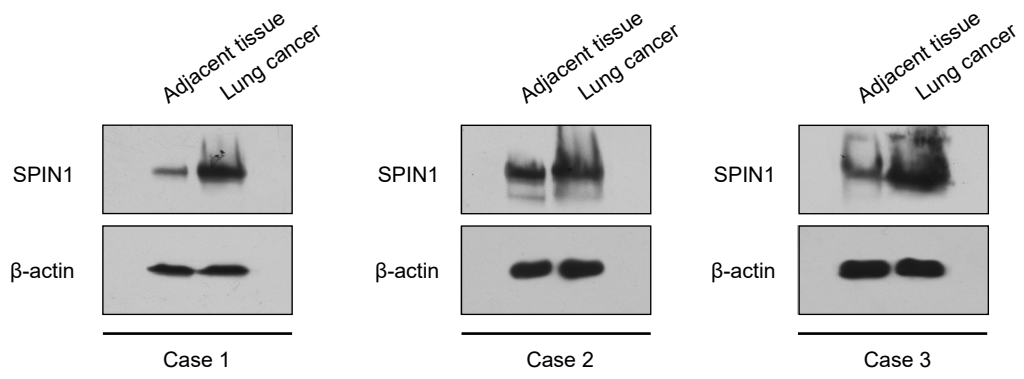

**Figure S4. SPIN1 is upregulated in NSCLC patients.** SPIN1 expression was analyzed in human lung cancer tissues and adjacent tissues from 3 representative donors by Western blotting.

**Supplementary Table 1** Clinicopathological characteristics of NSCLC patients

| <b>Characteristics</b> | <b>n (%)</b> |
|------------------------|--------------|
| Age                    |              |
| $\geq$ 60              | 47 (55.3%)   |
| $<$ 60                 | 38 (44.7%)   |
| Gender                 |              |
| Male                   | 62 (72.9%)   |
| Female                 | 23 (27.1%)   |
| Tumor size (cm)        |              |
| $>$ 3                  | 34 (40.0%)   |
| $\leq$ 3               | 51 (60.0%)   |
| TNM Stage              |              |
| I                      | 43 (50.6%)   |
| II                     | 31 (36.5%)   |
| III                    | 11 (12.9%)   |
| Pleural invasion       |              |
| NO                     | 68 (80.0%)   |
| Yes                    | 17 (20.0%)   |
| Metastasis             |              |
| NO                     | 51 (60.0%)   |
| Yes                    | 34 (40.0%)   |

**Supplementary Table 2** Primer sequences of Oligonucleotides

| <b>Name</b>                                               | <b>Forward (5'→3')</b>  | <b>Reverse (5'→3')</b>    |
|-----------------------------------------------------------|-------------------------|---------------------------|
| <b>Primer sequences for real-time quantitative RT-PCR</b> |                         |                           |
| <b>SPIN1</b>                                              | GTTCTGGACCAGGTGCCTGTAAA | CTGTCTCAAACATATGTCCACTG   |
| <b>β-actin</b>                                            | ATCACCATTGGCAATGAGCG    | TTGAAGGTAGTTTCGTGGAT      |
| <b>Primers sequences for PCR</b>                          |                         |                           |
| <b>SPIN1 3'UTR</b>                                        | ATGTCATCACAACTCTGCCAAA  | TTTACAGTCAGGAGTTGCACATAAA |
| <b>SPIN1 3'UTR Mut</b>                                    | CTTGTTCCAGGAATTACCACGGA | TCCGTGGTAATTCCTGGAACAAG   |
| <b>SPIN1</b>                                              | ATGAAGACCCCATTCGGAAAGAC | CTAGGATGTTTTCACCAAATCGTA  |
